# Supplementary material for: Osteosarcoma in Pediatric and Adult Populations: Are Adults Just Big Kids?
Source: MDPI journal article supplement (doi:10.3390/cancers15205044), 2023-10-19
Supplement: s1 [file s1]

**Supplemental Table S1.** Selected References for Mitogenic Signaling and Cell Cycle Checkpoint Alterations in Osteosarcoma

| Molecular Alteration                    | N                                                                                    | Key findings                                                                                                     | Reference              |
|-----------------------------------------|--------------------------------------------------------------------------------------|------------------------------------------------------------------------------------------------------------------|------------------------|
| <i>TP53</i> alterations                 | 765                                                                                  | < 30 years: 3.8% with germline mutations<br>>30 years : 0% with germline mutations                               | Mirabello et al., 2015 |
|                                         | 34                                                                                   | ≤ 18 years: >90% with <i>TP53</i> alterations<br>No adults included in this study.                               | Chen et al., 2014      |
|                                         | 25                                                                                   | 18 samples with somatic alterations (ages included 8-79), not reported by age                                    | Lorenz et al., 2016    |
|                                         | 59                                                                                   | 12% had germline <i>TP53</i> variants<br>75% had <i>TP3</i> inactivation                                         | Perry et al. 2014      |
| <i>MDM2</i> / <i>CDK4</i> amplification | 207                                                                                  | 16% osteosarcoma samples in pan-cancer study with <i>MDM2</i> amplification, no specification of age of patients | Momand et al., 1998    |
|                                         | 34                                                                                   | ≤18 years: 3% with structural variant in <i>MDM2</i><br>No adults included in this study.                        | Chen et al., 2014      |
|                                         | 66                                                                                   | 14% with <i>MDM2</i> or <i>CDK4</i> amplification                                                                | Suehara et al., 2019   |
| <i>RB1</i>                              |                                                                                      | Germline <i>RB1</i> mutations confers 400-500x risk of osteosarcoma over general population                      | Wong et al., 1997      |
|                                         | 59 (ages 6-28)                                                                       | 3% with somatic <i>RB1</i> mutations, 61% with <i>RB1</i> deletion                                               | Perry et al., 2014     |
|                                         | 34                                                                                   | ≤18 years: 29% with somatic <i>RB1</i> alteration<br>No adults included in this study.                           | Chen et al, 2014       |
|                                         | 72 samples (from 67 total patients)<br>n=33, age range 8–18<br>n=34, age range 19–80 | 19.4% of all samples with <i>RB1</i> alterations, no difference between children or adults                       | Suehara et al, 2019    |
|                                         | 30                                                                                   | 43% with somatic <i>RB1</i> alterations (8 patients 18 or older, oldest 42)                                      | Toguchida et al, 1988  |
| <i>MYC</i>                              | 56                                                                                   | 85.7% of all tumors with c- <i>MYC</i> expression by IHC                                                         | Wu et al., 2012        |
|                                         | 25                                                                                   | Amplification in 7% adults                                                                                       | Ladanyi et al., 1993   |
|                                         | 258                                                                                  | Amplification in 40% children and 5% adults                                                                      | De Noon et al., 2021   |
